# Supplementary material for: Validation of the high-performance of pyrosequencing for clinical MGMT testing on a cohort of glioblastoma patients from a prospective dedicated multicentric trial
Source: PubMed Central journal article supplement (PMC5308700; doi:10.18632/oncotarget.11322), 2016-08-17
Supplement: oncotarget-07-61916-s001.pdf [file oncotarget-07-61916-s001.pdf]

## **Validation of the high-performance of pyrosequencing for clinical *MGMT* testing on a cohort of glioblastoma patients from a prospective dedicated multicentric trial**

### **SUPPLEMENTARY TABLE**

**Supplementary Table S1: Results for the 88 samples tested with the two techniques on both types of tumor specimen**

See Supplementary File 1
